# Supplementary material
Source: Springer Nature journal article supplement (https://www.springermedizin.de/resource/supplementary/12874_2013_994_MOESM3_ESM.pdf/9433012)

**a**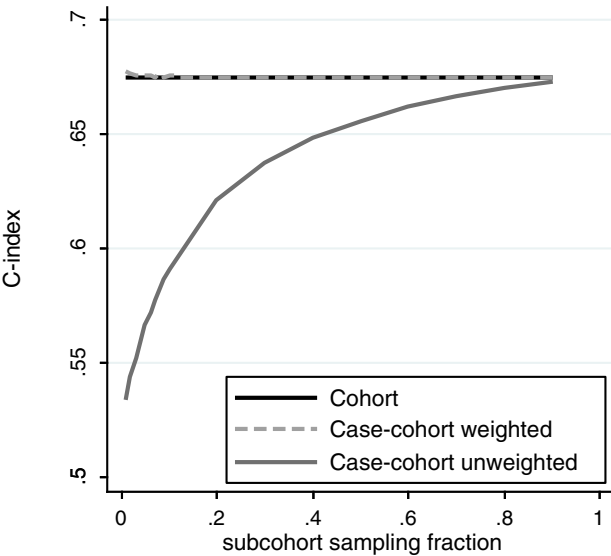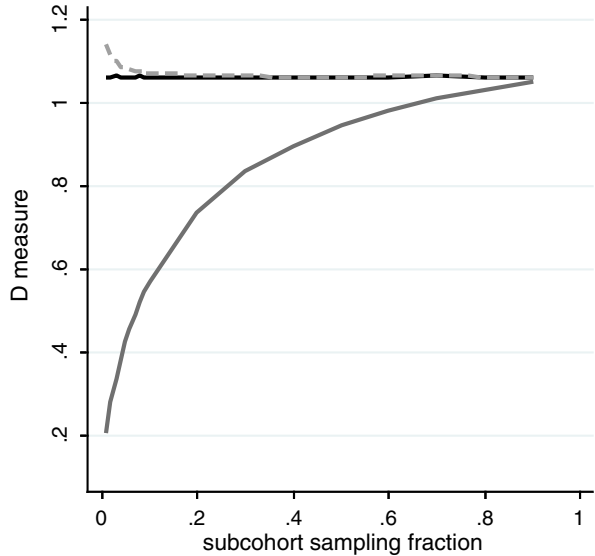**b**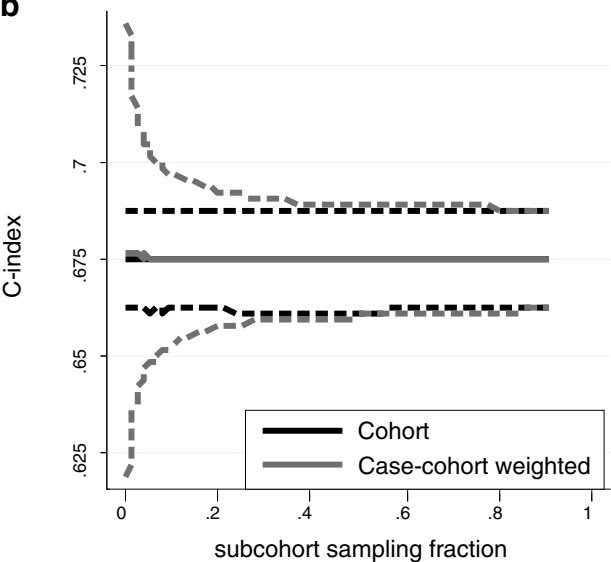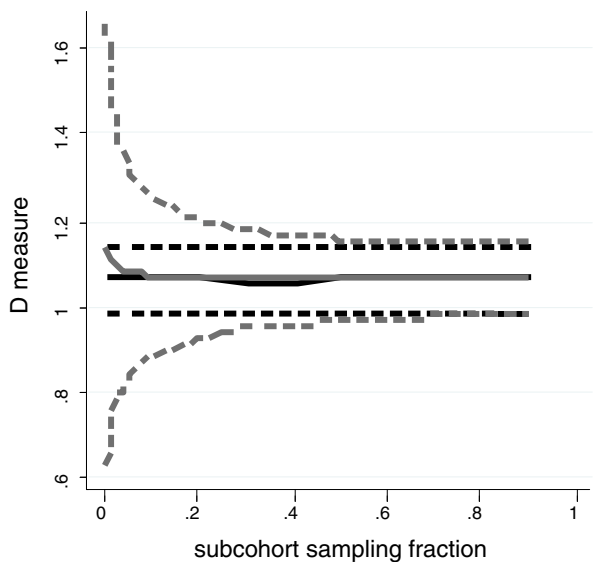

Supplement: MOESM3 [file 9433012]
